# Supplementary material for: Single Excited Dual Band Luminescent Hybrid Carbon Dots-Terbium Chelate Nanothermometer
Source: MDPI journal article supplement (doi:10.3390/nano11113080), 2021-11-15
Supplement: s1 [file s1]

# Supplementary Materials

## Single Excited Dual Band Luminescent Hybrid Carbon Dots-Terbium Chelate Nanothermometer

**Rustem R. Zairov** <sup>1,\*</sup>, **Alexey P. Dovzhenko** <sup>2</sup>, **Kirill A. Sarkanich** <sup>2</sup>, **Irek R. Nizameev** <sup>3</sup>,  
**Andrey V. Luzhetskiy** <sup>4</sup>, **Svetlana N. Sudakova** <sup>1</sup>, **Sergey N. Podyachev** <sup>1</sup>, **Vladimir A. Burilov** <sup>2</sup>,  
**Ivan M. Vatsouro** <sup>5</sup>, **Alberto Vomiero** <sup>6,7</sup> and **Asiya R. Mustafina** <sup>1</sup>

<sup>1</sup> Arbuzov Institute of Organic and Physical Chemistry, FRC Kazan Scientific Center, Russian Academy of Sciences, Arbuzov Str., 8, 420088 Kazan, Russia; sudakova@iopc.ru (S.N.S.); spodyachev@gmail.com (S.N.P.); asiyamust@mail.ru (A.R.M.)

<sup>2</sup> Department of physical chemistry, Kazan (Volga Region) Federal University, Kremlyovskaya Str., 18, 420008 Kazan, Russia; aleksej\_dovzhenko@mail.ru (A.P.D.); sarkanich98@mail.ru (K.A.S.); ultrav@bk.ru (V.A.B.)

<sup>3</sup> Department of Nanotechnologies in electronics, Kazan National Research Technical University Named after A.N. Tupolev-KAI, 10, K. Marx Str., 420111 Kazan, Russia; irek.rash@gmail.com

<sup>4</sup> Federal State Autonomous Educational Institution of Higher Education "Gubkin Russian State University of Oil and Gas" (National Research University), Leninsky Prospect, 65, 119991 Moscow, Russia; luzhetskiy@yandex.ru

<sup>5</sup> Department of Chemistry, M. V. Lomonosov Moscow State University, Lenin's Hills 1, 119991 Moscow, Russia; vatsouro@petrol.chem.msu.ru

<sup>6</sup> Department of Molecular Sciences and Nanosystems, Ca' Foscari University Venezia, Via Torino 155, 30172 Venezia-Mestre, Italy; alberto.vomiero@ltu.se

<sup>7</sup> Division of Materials Science, Department of Engineering Sciences and Mathematics, Luleå University of Technology, SE-971 87 Luleå, Sweden

\* Correspondence: rustem@iopc.ru; Tel.: +7-843-2734573; Fax: +7-843-2731872

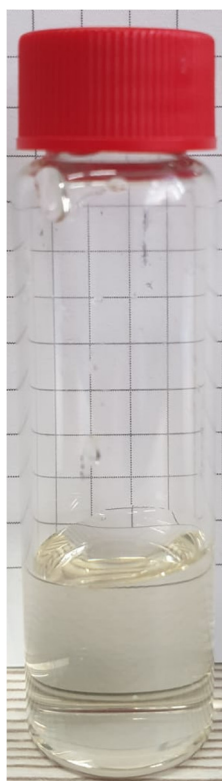

**Figure S1.** Image of CDs dispersion in water ( $C=10\ \mu\text{g mL}^{-1}$ ).

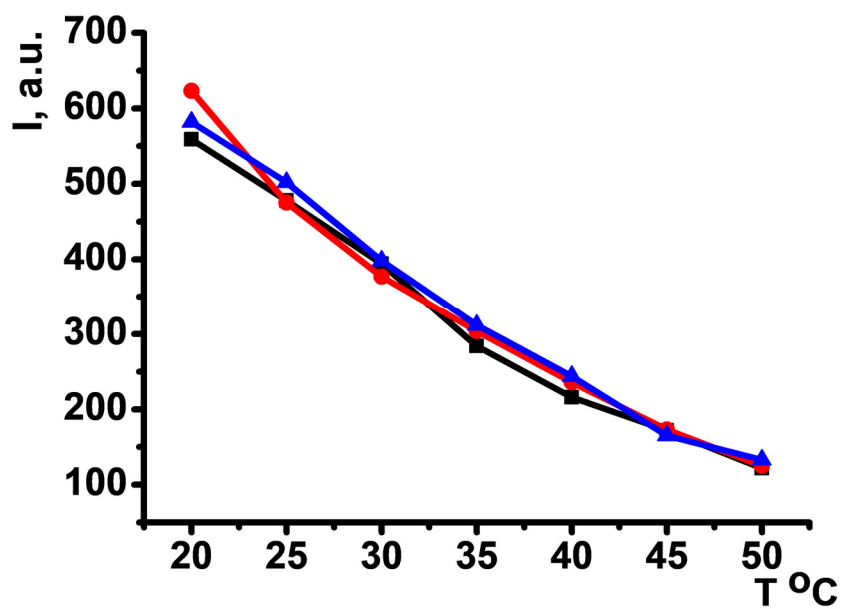

**Figure S2.** Luminescence intensity of  $[\text{TbL}]^+$  ( $\lambda_{\text{em}}=547\ \text{nm}$ ) versus temperature during heating-cooling-heating cycle in DMF ( $C_{\text{L}}=C_{\text{Tb}}=1\cdot 10^{-4}\ \text{M}$ ).

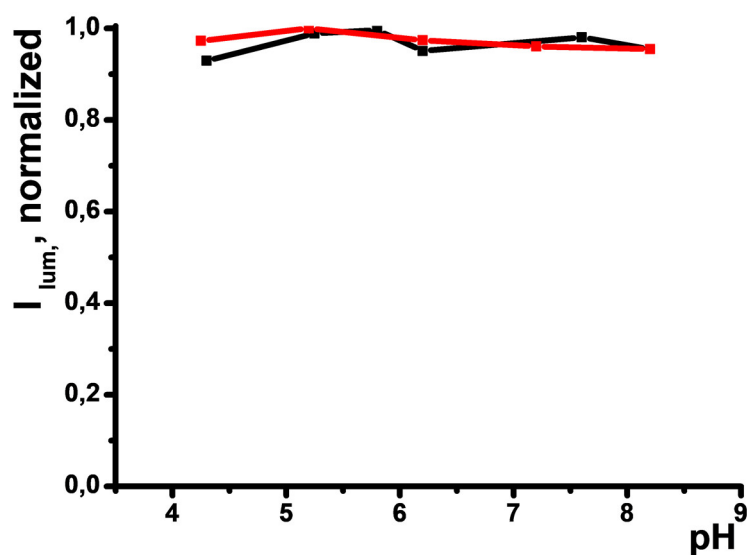

**Figure S3.** pH-dependency of CDs ( $\lambda_{em}=450$  nm,  $C=0.01$  g/L) in physiological range of pH=4.5–8.0.

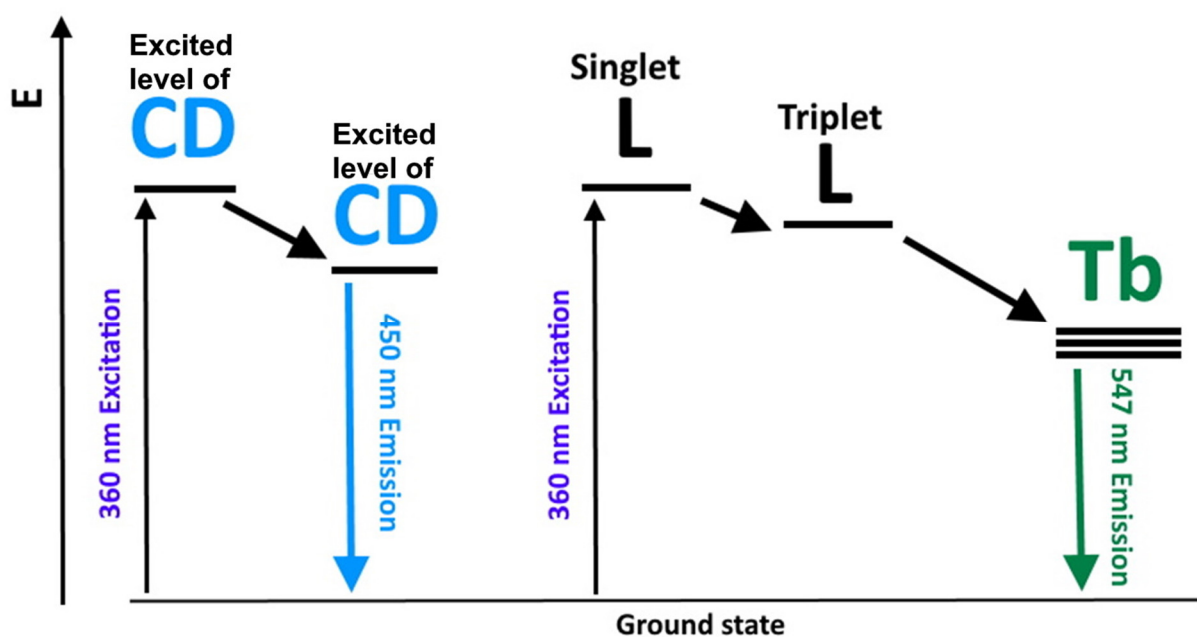

**Figure S4.** Tentative Jablonski diagram showing photophysical processes responsible for generation of dual band emission of PSS-{CDs-[TbL]} colloids.

**Table S1.** Luinescence decay exponential deconvolution data and lifetimes of [TbL]<sup>+</sup> at different CDs in DMF ( $C_{CD}=0.09\text{-}3.15\text{ mg}\cdot\text{L}^{-1}$ ;  $C_{[TbL]}=0.45\text{ mM}$ ).

| $C_{CD}$ | $y_0$ | $A_1$  | $\tau$ ms |
|----------|-------|--------|-----------|
| 0.09     | 2.057 | 1495.2 | 0.896     |
| 0.18     | 2.076 | 1409.4 | 0.914     |
| 0.27     | 2.447 | 1449.8 | 0.920     |
| 0.36     | 2.258 | 1568.7 | 0.932     |
| 0.45     | 2.159 | 1560.3 | 0.964     |
| 1.2      | 2.302 | 1552.3 | 0.968     |
| 1.4      | 2.263 | 1507.7 | 0.974     |
| 1.6      | 2.416 | 1500.8 | 0.976     |
| 1.8      | 2.731 | 1566.7 | 0.989     |
| 0.9      | 2.999 | 1571.7 | 0.980     |
| 1.35     | 2.729 | 1474.6 | 1.016     |
| 1.8      | 3.202 | 1499.5 | 1.032     |
| 2.25     | 2.922 | 1499.9 | 1.048     |
| 3.15     | 3.102 | 1511.1 | 1.072     |

**Table S2.** Average lifetimes of Tb(III) excited state for PSS-{CDs-[TbL]} colloids obtained according to *Synthesis\_1* and *Synthesis\_2* in water.

|                    | $A_1$ | $t_1$ | $A_2$ | $t_2$ | $t_{avg}$ , ms | Adj. R-Square |
|--------------------|-------|-------|-------|-------|----------------|---------------|
| <i>Synthesis_1</i> | 1.282 | 0.068 | 0.321 | 0.305 | 0.193          | 0.99704       |
| <i>Synthesis_2</i> | 1.161 | 0.087 | 0.356 | 0.309 | 0.203          | 0.99985       |

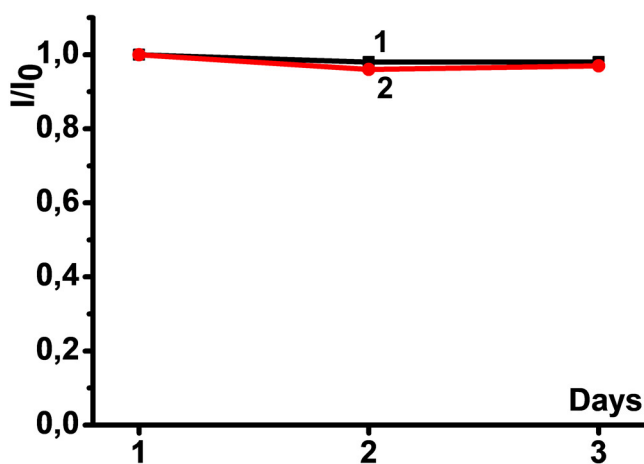

**Figure S5.** The luminescence intensity of PSS-{CDs-[TbL]} water colloids for each of 3 days of storage ( $I$ ) related to initial luminescence intensity ( $I_0$ ) at emission wavelengths 450 nm (1) and 547 nm (2).

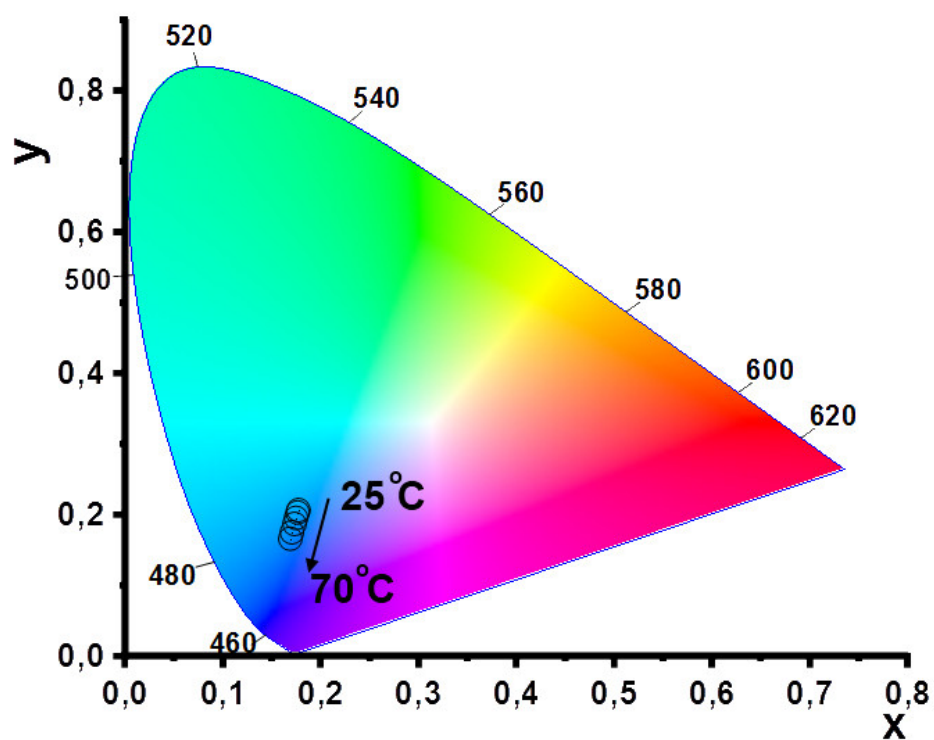

**Figure S6.** Chromaticity diagram for PSS-{CDs-[TbL]} (*Synthesis\_1*) ( $\lambda_{\text{ex}}=360$  nm) as a function of temperature over the 25–70°C range.
